# Supplementary material
Source: PubMed Central journal article supplement (PMC8488000)
Supplement: NIHMS1730774-supplement-Supplementary_Tables_1-3.pdf [file NIHMS1730774-supplement-Supplementary_Tables_1-3.pdf]

| mRNA-1273<br>(µg) | Animal ID | Inflammation (H&E) <sup>1</sup> |                   |                 | IHC <sup>5</sup> |      |     |
|-------------------|-----------|---------------------------------|-------------------|-----------------|------------------|------|-----|
|                   |           | Lc <sup>2</sup>                 | Rmid <sup>3</sup> | Rc <sup>4</sup> | Lc               | Rmid | Rc  |
| <b>100 x2</b>     | 08N012    | -                               | +/-               | -               | -                | -    | -   |
|                   | DG3T      | +                               | +/-               | +/-             | -                | -    | -   |
|                   | 15C228    | -                               | -                 | -               | -                | -    | -   |
|                   | DGEH      | +                               | +/-               | +/-             | -                | -    | -   |
| <b>30 x2</b>      | 35987     | +/-                             | +/-               | +               | -                | -    | -   |
|                   | DGB3      | -                               | +/-               | ++              | -                | -    | -   |
|                   | MB13      | -                               | +/-               | +/-             | -                | -    | -   |
|                   | DH49      | -                               | -                 | +/-             | -                | -    | -   |
| <b>30 x1</b>      | 35975     | -                               | +/-               | +/-             | -                | +/-  | -   |
|                   | 17C179    | -                               | -                 | +/-             | -                | -    | -   |
|                   | DGI2      | +/-                             | +/-               | +/-             | -                | +/-  | -   |
|                   | DGJH      | -                               | +/-               | +++             | -                | -    | -   |
| <b>Naïve</b>      | G25M      | +                               | +                 | ++              | +                | +/-  | +/- |
|                   | 15C024    | +                               | ++                | ++              | -                | +    | +   |
|                   | DFZi      | +                               | ++                | ++              | -                | +    | +   |
|                   | A6V055    | ++                              | ++                | ++              | ++               | +    | +   |

**Supplementary Table 1. Assessment of lung inflammation and viral antigen on day 8 following SARS-CoV-2 B.1.351 challenge in mRNA-1273-immunized NHP.** Lung tissue was evaluated for the presence of inflammation by (H & E staining and evidence of virus infection by IHC for SARS-CoV-2 viral antigen.

<sup>1</sup> Inflammation scoring: - = minimal to absent, +/- = minimal to mild, + = mild to moderate, ++ = moderate to severe, +++ = severe

<sup>2</sup> Lc: left caudal lung lobe

<sup>3</sup> Rmid: right middle lung lobe

<sup>4</sup> Rc: right caudal lung lobe

<sup>5</sup> Immunohistochemistry SARS-CoV-2 antigen (Ag): - = no detection of virus Ag, +/- = rare/occasional Ag+ foci, + = multiple Ag+ foci

| Group                          | Animal ID  | WA-1 S-specific IgG <sup>1</sup><br>(IU/mL) <sup>2</sup> | WA-1 RBD-specific<br>IgG (IU/mL) |
|--------------------------------|------------|----------------------------------------------------------|----------------------------------|
| <b>100 µg mRNA-1273<br/>x2</b> | 08N012     | 1002.4                                                   | 2069.5                           |
|                                | 1F-8       | 734.0                                                    | 1255.8                           |
|                                | DG3T       | 1161.7                                                   | 2329.0                           |
|                                | 15C228     | 1254.9                                                   | 1969.4                           |
|                                | DG94       | 1203.4                                                   | 2160.1                           |
|                                | DGMZ       | 719.7                                                    | 1268.8                           |
|                                | DGEH       | 1285.4                                                   | 3181.5                           |
|                                | DGBAA      | 1228.0                                                   | 2206.4                           |
|                                | <b>GMT</b> | <b>1049.0</b>                                            | <b>1972.7</b>                    |
| <b>30 µg mRNA-1273 x2</b>      | 35987      | 76.6                                                     | 143.6                            |
|                                | HNM        | 781.5                                                    | 1318.5                           |
|                                | DGB3       | 491.6                                                    | 879.4                            |
|                                | MI03       | 2392.3                                                   | 4460.5                           |
|                                | DH26       | 777.4                                                    | 1454.7                           |
|                                | MB13       | 434.5                                                    | 621.4                            |
|                                | DH49       | 542.6                                                    | 1062.8                           |
|                                | 36845      | 279.7                                                    | 460.8                            |
|                                | <b>GMT</b> | <b>495.1</b>                                             | <b>870.2</b>                     |
| <b>30 µg mRNA-1273 x1</b>      | 35975      | 75.4                                                     | 110.2                            |
|                                | HZF        | 284.7                                                    | 451.9                            |
|                                | LV41       | 97.8                                                     | 170.9                            |
|                                | 17C179     | 10.1                                                     | 18.7                             |
|                                | DGF1       | 21.1                                                     | 45.5                             |
|                                | DGW2       | 195.3                                                    | 283.2                            |
|                                | DGI2       | 28.3                                                     | 42.3                             |
|                                | DGJH       | 54.1                                                     | 74.0                             |
|                                | <b>GMT</b> | <b>58.3</b>                                              | <b>94.6</b>                      |
| Naïve                          | G25M       | 1.2                                                      | 5.9                              |
|                                | 07N001     | 0.3 <sup>3</sup>                                         | 1.6 <sup>4</sup>                 |
|                                | 15C184     | 1.4                                                      | 10.1                             |
|                                | 15C024     | 0.3                                                      | 1.6                              |
|                                | DGEI       | 0.3                                                      | 1.6                              |
|                                | A12V163    | 0.3                                                      | 1.6                              |
|                                | DFZi       | 0.3                                                      | 1.6                              |
|                                | A6V055     | 36.1                                                     | 1.6                              |
|                                | <b>GMT</b> | <b>0.8</b>                                               | <b>2.4</b>                       |

**Supplementary Table 2. SARS-CoV-2 WA-1 S- and RBD-specific antibody responses in international units (IU).**

<sup>1</sup>Sera were collected at week 12 and assessed for SARS-CoV-2 WA-1 S- and RBD-specific IgG by 4-plex MULTI-ARRAY ELISA.

<sup>2</sup>IgG quantities were extrapolated as IU/mL using WHO standards.

<sup>3</sup>S-specific IgG lower limit of detection = 0.3076 IU/mL

<sup>4</sup>RBD-specific IgG lower limit of detection = 1.5936 IU/mL.

**A**

| Variant | MUTLI-ARRAY ELISA                                                     |
|---------|-----------------------------------------------------------------------|
| WA-1    | <i>No mutations</i>                                                   |
| D614G   | <i>N/A<sup>1</sup></i>                                                |
| B.1.1.7 | Δ69-70, Δ144, 501Y, 570D, 614G, 681H, 716I, 982A, 1118H               |
| P.1     | 18F, 20N, 26S, 138Y, 190S, 417T, 484K, 501Y, 614G, 655Y, 1027I, 1176F |
| B.1.351 | 18F, 80A, 215G, Δ242-244, 246I, 417N, 484K, 501Y, 614G, 701V          |

**B**

| Variant | Pseudovirus                                                           |                                                              |
|---------|-----------------------------------------------------------------------|--------------------------------------------------------------|
|         | Lentiviral                                                            | VSV                                                          |
| WA-1    | N/A                                                                   | <i>N/A</i>                                                   |
| D614G   | 614G                                                                  | 614G                                                         |
| B.1.1.7 | Δ69-70, Δ144, 501Y, 570D, 614G, 681H, 716I, 982A, 1118H               | <i>N/A</i>                                                   |
| P.1     | 18F, 20N, 26S, 138Y, 190S, 417T, 484K, 501Y, 614G, 655Y, 1027I, 1176F | <i>N/A</i>                                                   |
| B.1.351 | 18F, 80A, 215G, Δ242-244, 246I, 417N, 484K, 501Y, 614G, 701V          | 18F, 80A, 215G, Δ242-244, 246I, 417N, 484K, 501Y, 614G, 701V |

**C**

| Variant | Live Virus                                             |
|---------|--------------------------------------------------------|
| WA-1    | <i>N/A</i>                                             |
| D614G   | 614G                                                   |
| B.1.1.7 | <i>N/A</i>                                             |
| P.1     | <i>N/A</i>                                             |
| B.1.351 | 18F, 80A, 215G, Δ242-244, 417N, 484K, 501Y, 614G, 701V |

**Supplementary Table 3. Spike mutations included in MULTI-ARRAY ELISA (A), pseudovirus (B) and live virus (C) assay reagents as compared to Wuhan-1 strain (Genbank #: MN908947.3).**

<sup>1</sup>N/A: not applicable
